# Supplementary material
Source: PubMed Central journal article supplement (PMC4115324)
Supplement: NIHMS601248-supplement-Supplementary.pdf [file NIHMS601248-supplement-Supplementary.pdf]

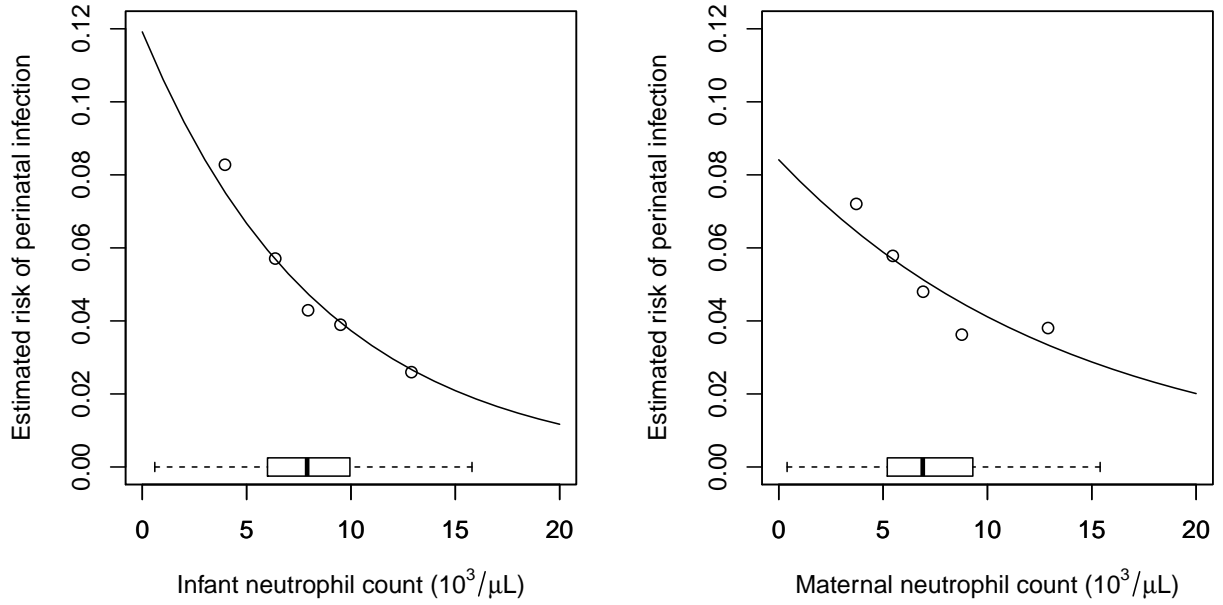

Figure 1: Estimated risk of perinatal infection. The smooth curves are based on fitted log binomial regression models of perinatal infection risk. For the left (right) panel, infant (maternal) neutrophil was the sole covariate in the regression model. The circles depict the observed proportion of infants infected perinatally within strata defined by infant (left) and maternal (right) neutrophil counts; strata were determined by the quintiles of the observed neutrophil distributions. The distributions of neutrophil counts are shown by the boxplots at the bottom of the graphs.
